# Supplementary material for: Structural effects of amphiphilic protein/gold nanoparticle hybrid based nanozyme on peroxidase-like activity and silver-mediated inhibition
Source: Royal Society of Chemistry journal article supplement (doi:10.1039/c6ra23773h), 2016-01-01
Supplement: c6ra23773h1.pdf [file c6ra23773h1.pdf]

## **Supporting Information**

### **Structural effects of amphiphilic protein/gold nanoparticle hybrid based nanozyme on peroxidase-like activity and silver-mediated inhibition**

Yan Liu,\* Yinping Xiang, Ding Ding, Rong Guo\*

College of Chemistry and Chemical Engineering, Yangzhou University, Yangzhou,  
225002, P. R. China. Tel: +86-514-87971802; Fax: +86-514-87311374; Email:  
yanliu@yzu.edu.cn, guorong@yzu.edu.cn.

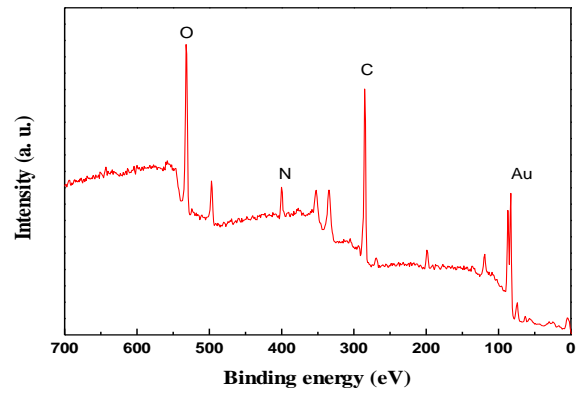

Fig. S1 The whole XPS spectrum of  $\beta$ -casein-AuNPs.

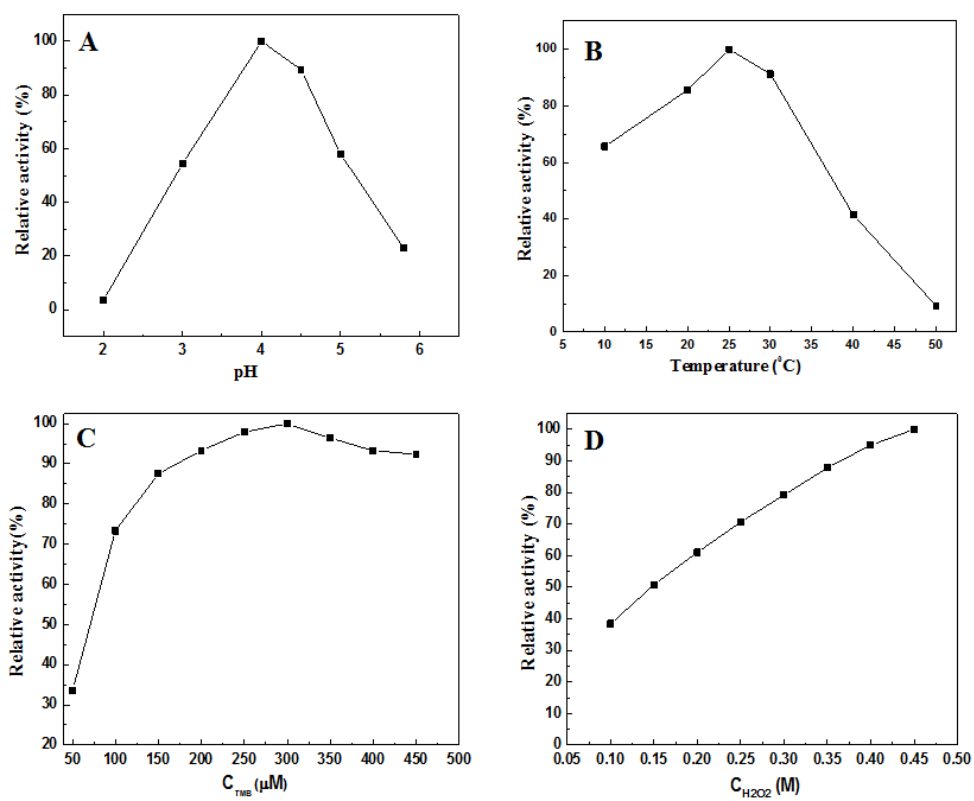

Fig. S2 Effect of pH (A), temperature (B), TMB concentration (C) and  $H_2O_2$  concentration (D) on the catalytic relative activity of CM-AuNPs.

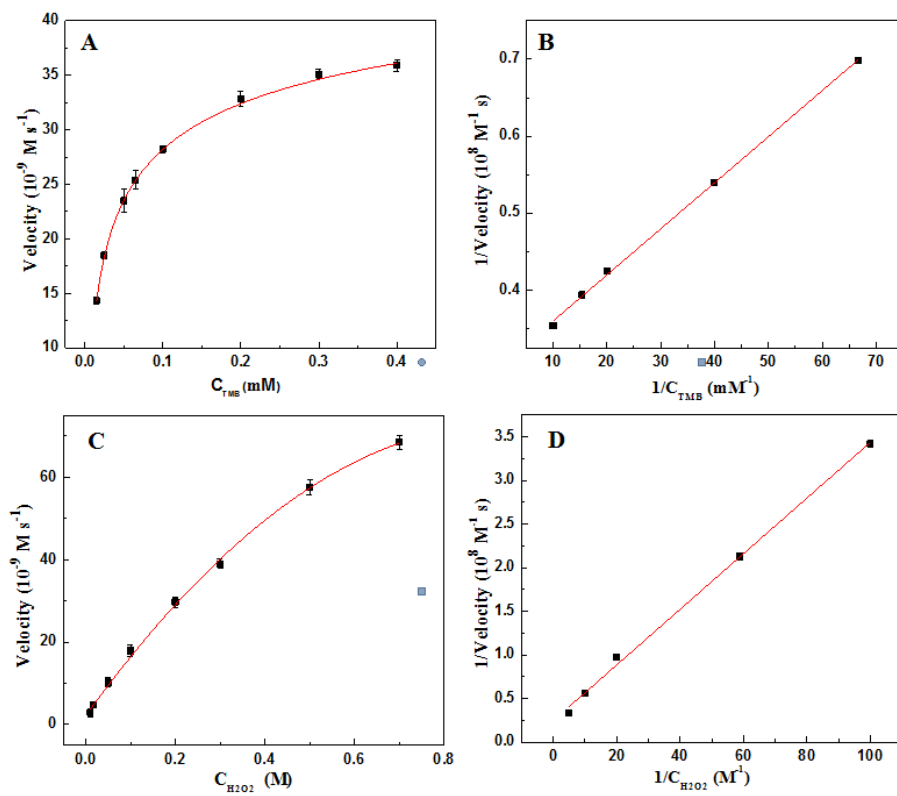

Fig. S3 (A, C) Correlation of initial reaction velocity with the concentration of one substrate (H<sub>2</sub>O<sub>2</sub> or TMB) fixed and the other varied. (B, D) The double-reciprocal plots of (A) and (C).

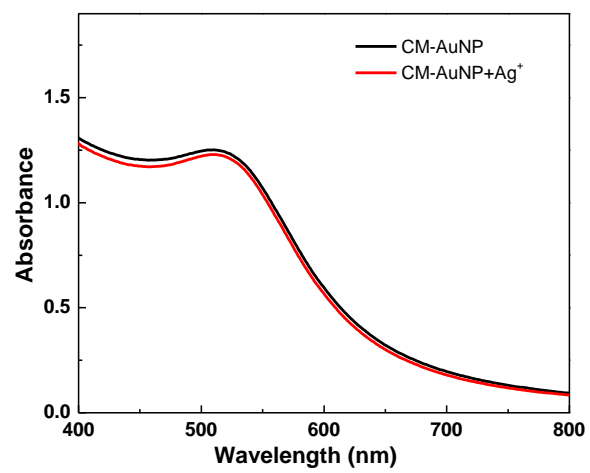

Fig. S4 UV-visible spectra of  $\beta$ -casein-AuNPs before (black) and after (red) the addition of 10  $\mu$ M Ag<sup>+</sup>.

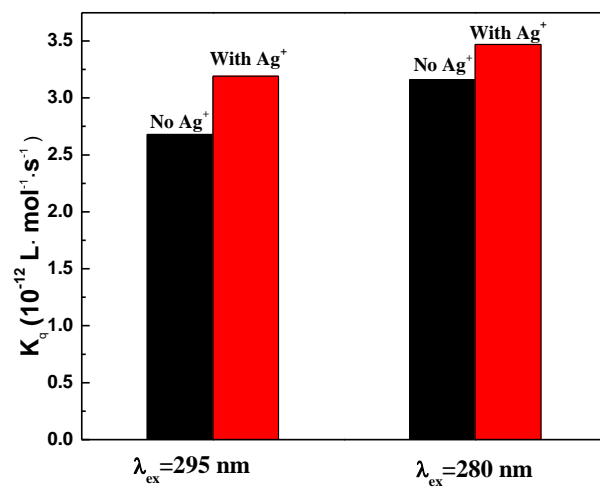

**Fig. S5** Quenching constant of the interaction between TMB and  $\beta$ -casein with and without  $\text{Ag}^+$ .

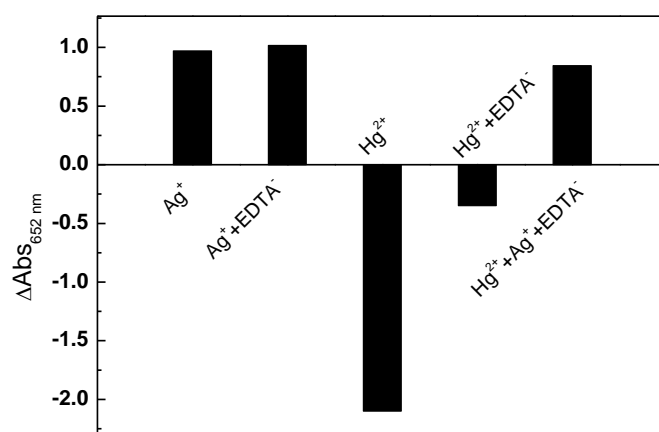

Fig. S6 Effect of 0.5 mM EDTA on  $\Delta A_{652 \text{ nm}}$  generated by  $\beta$ -casein-AuNPs in the presence of  $\text{Ag}^+$  and  $\text{Hg}^{2+}$ .  $\Delta A_{652 \text{ nm}} = A_0 - A$ ,  $A_0$  and  $A$  are the absorbance at 652 nm obtained from the system without and with ions, respectively. The reaction system contains 0.3 mM TMB, 300 mM  $\text{H}_2\text{O}_2$ .

Table S1 Assay results of lake water samples by using the proposed  $\beta$ -casein-AuNP platform and the comparison of our results with the standard  $\text{Ag}^+$  concentrations.

| Sample | added $\text{Ag}^+$ concentration ( $\mu\text{M}$ ) | $\text{Ag}^+$ concentration detected by $\beta$ -casein-AuNP ( $\mu\text{M}$ ) | Recovery (%) |
|--------|-----------------------------------------------------|--------------------------------------------------------------------------------|--------------|
| 1      | 0.50                                                | 0.48                                                                           | 96.0         |
| 2      | 1.00                                                | 1.07                                                                           | 107.0        |
| 3      | 2.00                                                | 1.94                                                                           | 97.0         |

The results are the average values of three parallel assays.
